# Supplementary material for: Computational Screening of the Natural Product Osthole and Its Derivates for Anti-Inflammatory Activity
Source: MDPI journal article supplement (doi:10.3390/life12040505), 2022-03-30
Supplement: s1 [file s1]

Article

# Computational Screening of the Natural Product Osthole and Its Derivates for Anti-Inflammatory Activity

Angela Mosebarger <sup>1</sup>, Rambabu N. Reddi <sup>2</sup>, Ramkumar Menon <sup>1</sup> and Ananth Kumar Kammala <sup>1,\*</sup>

<sup>1</sup> Division of Basic & Translational Research, Department of Obstetrics & Gynecology, The University of Texas Medical Branch at Galveston, 301 University Blvd., Galveston, TX 77555, USA; anmoseba@utmb.edu (A.M.); ra2menon@utmb.edu (R.M.)

<sup>2</sup> Department of Organic Chemistry, Weizmann Institute of Science, Rehovot, 234 Herzl St, PO Box 26 Rehovot 7610001 Israel; rambabu.reddi@weizmann.ac.il

\* Correspondence: ankammal@utmb.edu; Tel.: +1-517-899-6963

## Supplementary Materials

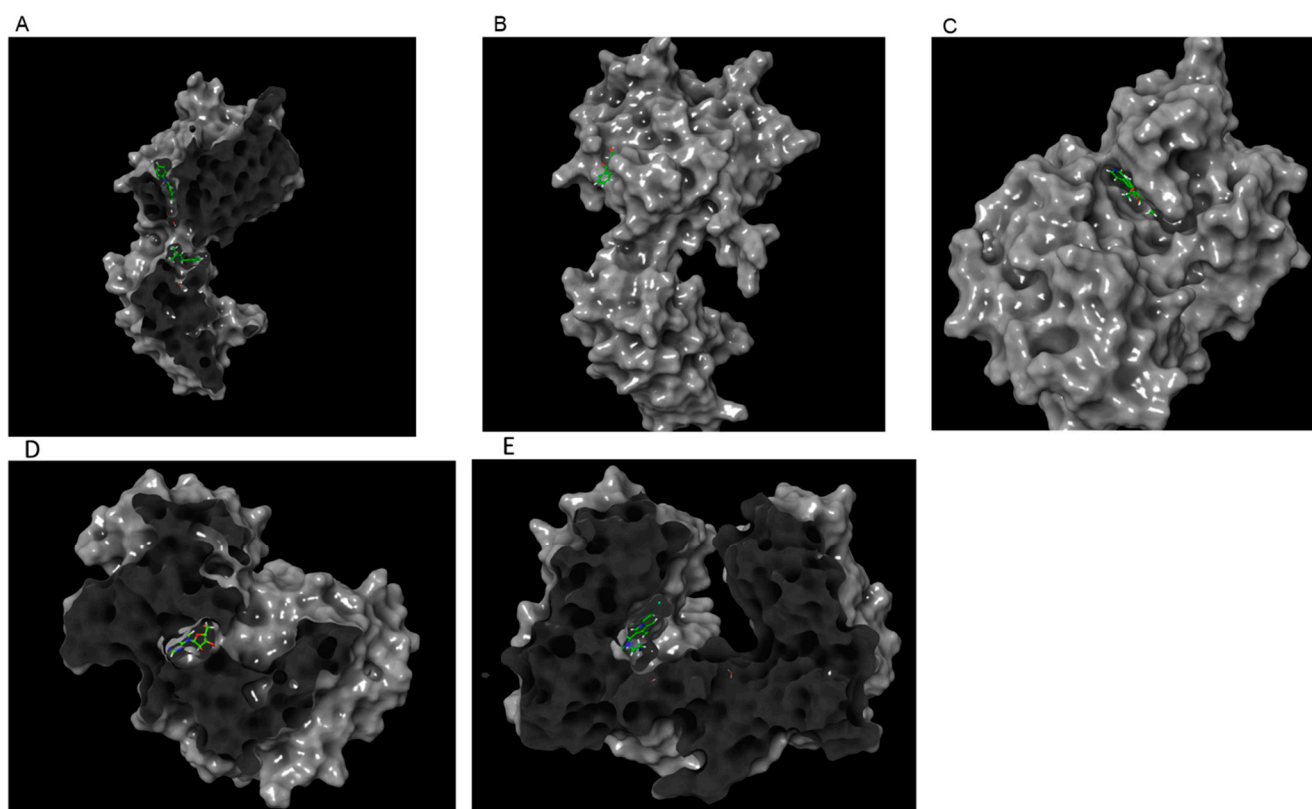

**Figure S1.** Molecular modeling of highest scoring compound in each binding site to demonstrate the precise location of binding on the protein. (A) 1SVC (NF-κB C62A) with inhibitor DHMEQ at Site 1 and Ligand 4 at Site 2 with water included in binding site; (B) Modified 1SVC (NF-κB) with DHMEQ docked at Cys62 with no water included in the binding site; (C). 4QTB (ERK1) with Ligand 9 with selected water molecules included in the binding site; (D) 2ZOQ (ERK1) with (2r,3r,4s,5r)-2-(4-amino-5-iodo-7h-pyrrolo[2,3-d]pyrimidin-7-yl)-5-(hydroxymethyl)tetrahydrofuran-3,4-diol with water included in the binding site; (E) 2AZ5 (TNF-α) with 6,7-dimethyl-3-[(methyl[2-[methyl(1-[3-(trifluoromethyl)phenyl]-1h-indol-3-yl)methyl]amino]ethyl]amino)methyl]-4h-chromen-4-one and water included in the binding site.

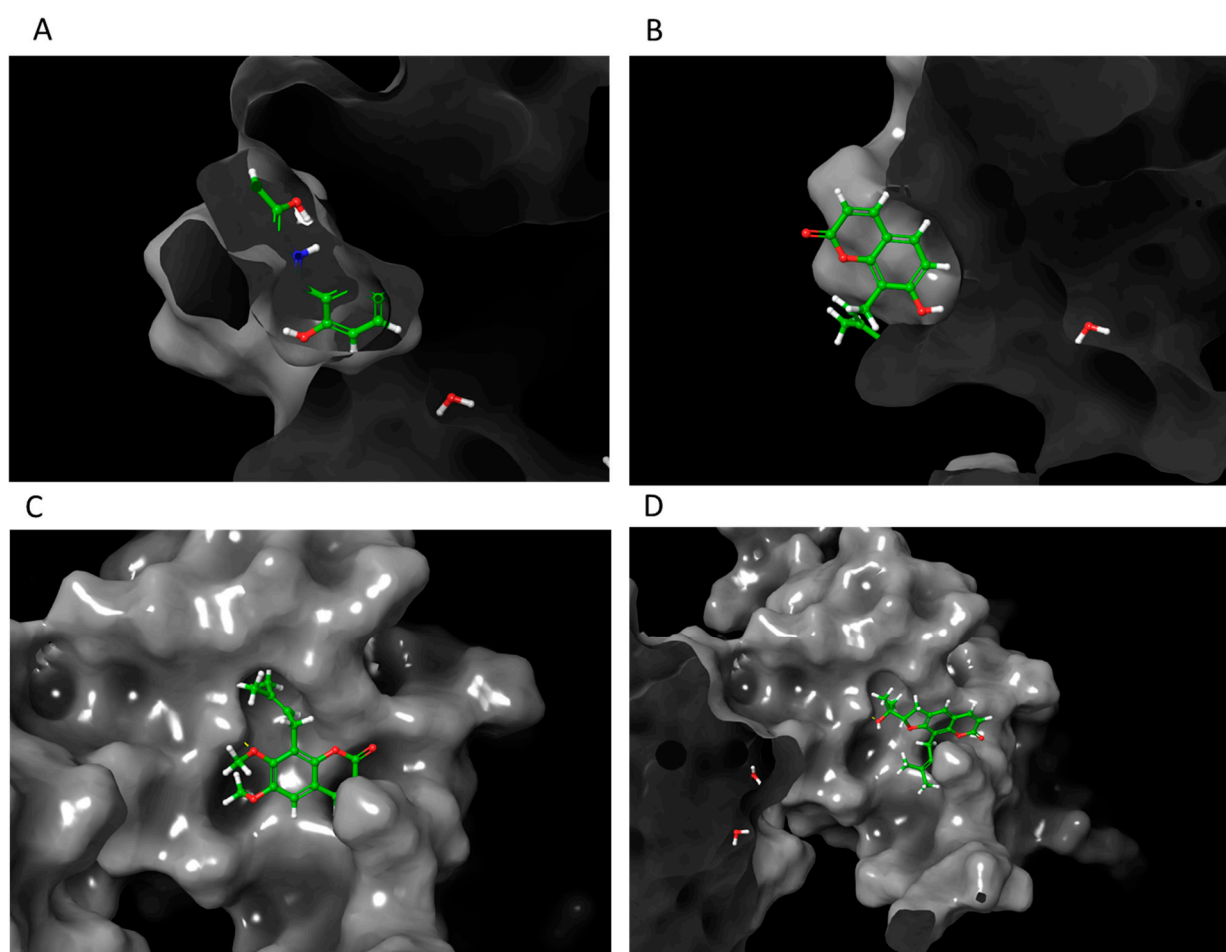

**Figure S2.** Molecular modeling of top-scoring compounds docked at binding site 1 detected by Schrodinger software in 1SVC (NF- $\kappa$ B C62A) with water included in the binding site. (A) Known inhibitor DHMEQ docked at Site 1; (B) Ligand 1 at binding site 1; (C) Ligand 11 at binding site 1; (D) Ligand 13 at binding site 1.

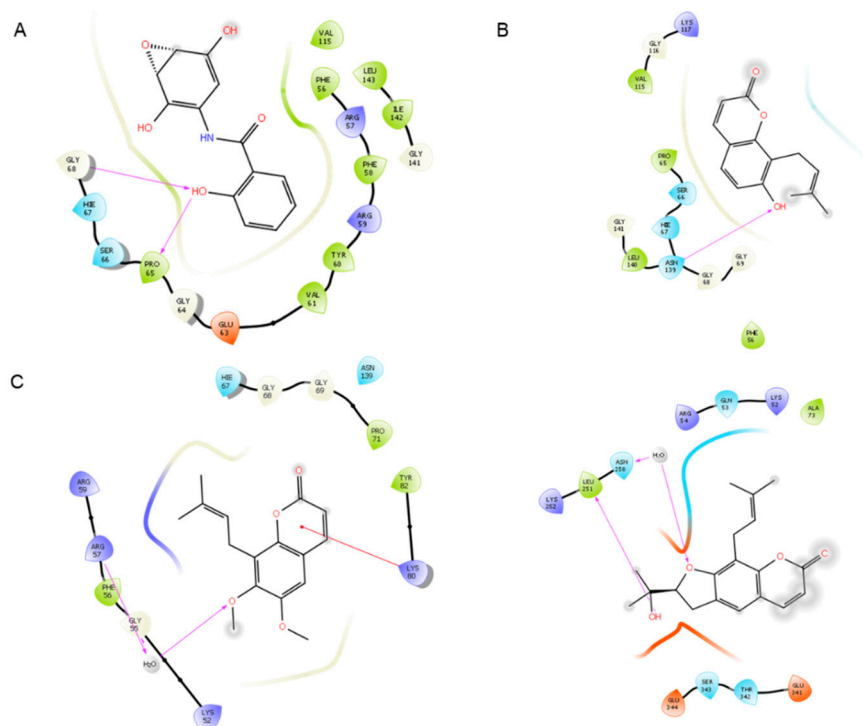

**Figure S3.** Scoring and residues of each potential binding site on 1SVC (NF- $\kappa$ B C62A) identified by Schrodinger Maestro software. Site 1 and site 2 were selected for analysis, although site 2 was later excluded due to low binding with the positive control DHMEQ.

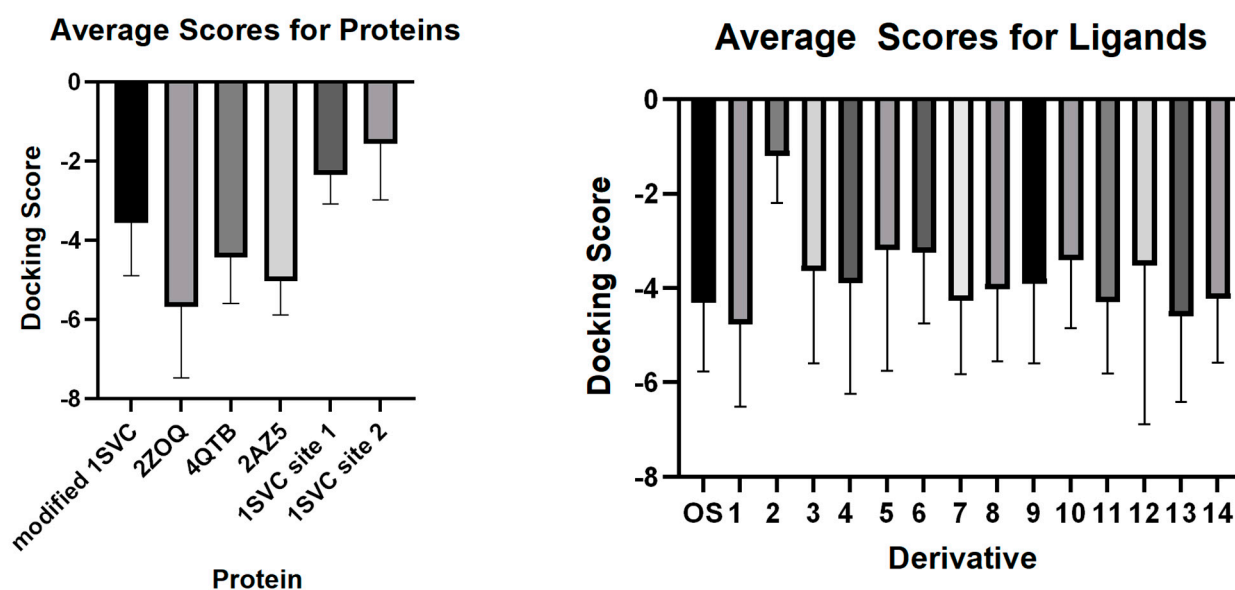

**Figure S4.** Average docking scores for each A. Protein screened and B. Ligand screened. Docking scores are given in kcal/mol. More negative scores correspond with better binding.

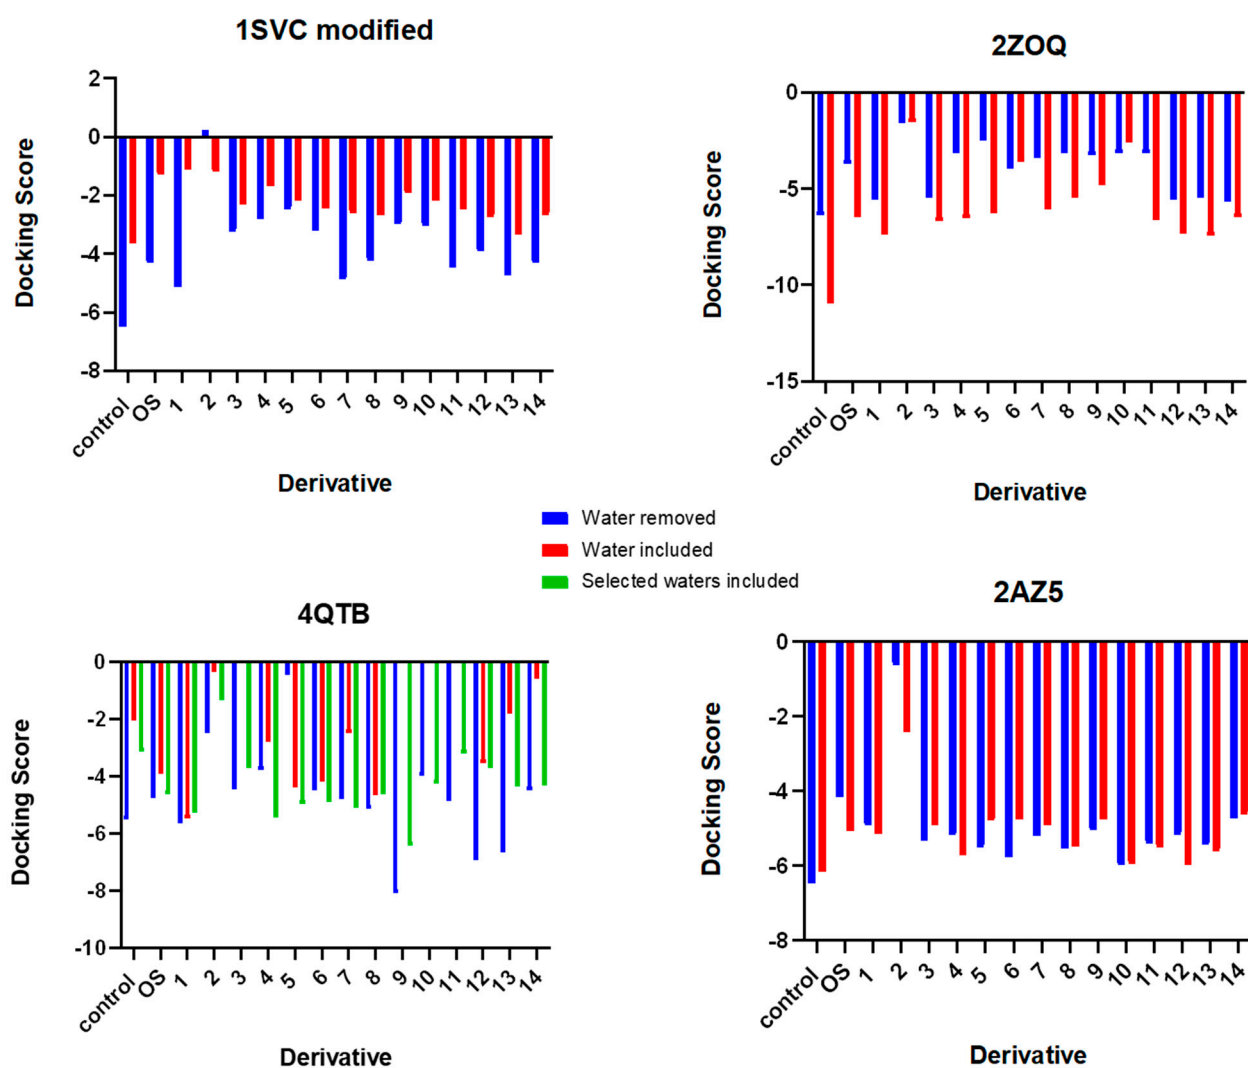

**Figure S5.** Docking score of each derivative with results of all the water conditions shown. Docking scores given in kcal/mol.

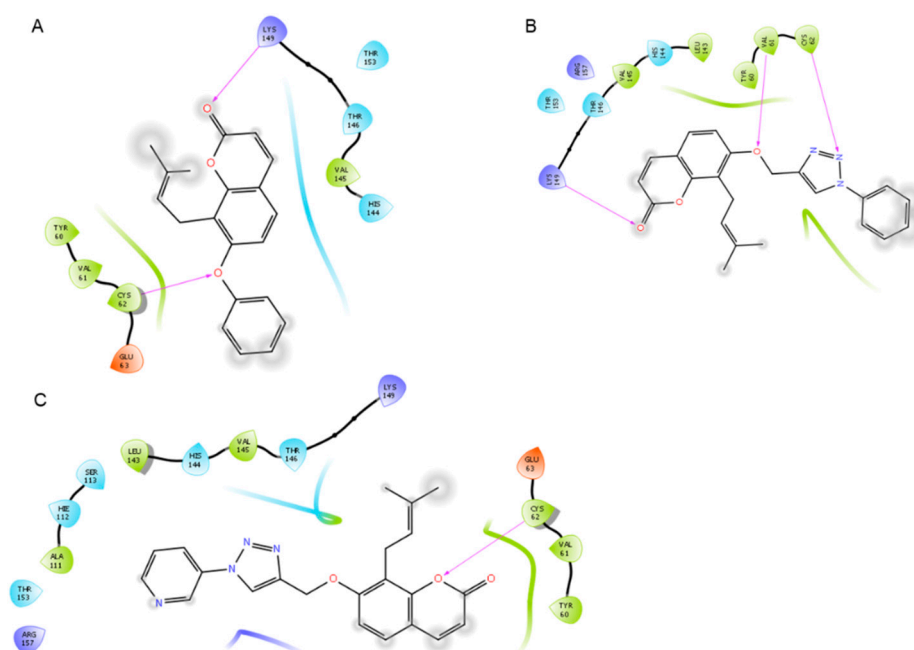

**Figure S6.** Protein-ligand interaction diagrams of compounds docked to modified 1SVC (NF-κB), demonstrating all compounds that showed interactions with Cys62. (A) Ligand 3; (B) Ligand 5; (C) Ligand 6.

**Table S1.** Scoring and residues of each potential binding site on 1SVC (NF-κB C62A) identified by Schrodinger Maestro software. Site 1 and site 2 were selected for analysis, although site 2 was later excluded due to low binding with the positive control DHMEQ.

| 1SVC binding site detection |            |        |         |         |                                                                                |
|-----------------------------|------------|--------|---------|---------|--------------------------------------------------------------------------------|
|                             | Site score | Dscore | Volume  | Balance | Residues                                                                       |
| site1                       | 0.935      | 0.963  | 154.007 | 0.938   | Chain P: 56,57,58,59,60,61,64,65,67,68,69,71,80,82,115,116,117,139,141,142,143 |
| site2                       | 0.72       | 0.619  | 100.842 | 0.092   | Chain P: 52,54,55,241,243,248,249,250,251,252,336,341,342,343,344              |
| site3                       | 0.714      | 0.57   | 65.513  | 0.241   | Chain P: 102,103,104,105,106,108,110,204,207,208,209,212                       |
| site4                       | 0.617      | 0.543  | 120.393 | 0.041   | Chain P: 57,58,60,63,144,147,150,205,206,208,209,210,211,242,244,245,246       |
| site5                       | 0.612      | 0.55   | 47.334  | 0.417   | Chain P: 116,117,118,124,126,136,137,138,139,140                               |
| ideal                       | >1         | >1     | >225    | >0.3    |                                                                                |

**Table S2.** Residues included in each binding site detected by Maestro software.

| 1SVC binding site detection |     |        |     |        |     |        |     |        |     |
|-----------------------------|-----|--------|-----|--------|-----|--------|-----|--------|-----|
| site 1                      |     | site 2 |     | site 3 |     | site 4 |     | site 5 |     |
| 56                          | phe | 52     | lys | 102    | thr | 57     | arg | 116    | gly |
| 57                          | arg | 54     | arg | 103    | asn | 58     | phe | 117    | lys |
| 58                          | phe | 55     | gly | 104    | gly | 60     | tyr | 118    | his |
| 59                          | arg | 241    | tyr | 105    | lys | 63     | glu | 124    | cys |
| 60                          | tyr | 243    | ser | 106    | asn | 144    | his | 126    | val |
| 61                          | val | 248    | ala | 108    | his | 147    | lys | 136    | gly |
| 64                          | gly | 249    | ser | 110    | HIE | 150    | val | 137    | phe |
| 65                          | pro | 250    | asn | 204    | glh | 205    | thr | 138    | ala |
| 67                          | HIE | 251    | leu | 207    | glu | 206    | lys | 139    | asn |
| 68                          | gly | 252    | lys | 208    | met | 208    | met | 140    | leu |
| 69                          | gly | 336    | arg | 209    | asp | 209    | asp |        |     |
| 71                          | pro | 341    | glu | 212    | val | 210    | leu |        |     |
| 80                          | lys | 342    | thr |        |     | 211    | ser |        |     |
| 82                          | tyr | 343    | ser |        |     | 242    | asp |        |     |
| 115                         | val | 344    | glu |        |     | 244    | lys |        |     |
| 116                         | gly |        |     |        |     | 245    | ala |        |     |
| 117                         | lys |        |     |        |     | 246    | pro |        |     |
| 139                         | asn |        |     |        |     |        |     |        |     |
| 141                         | gly |        |     |        |     |        |     |        |     |
| 142                         | ile |        |     |        |     |        |     |        |     |
| 143                         | leu |        |     |        |     |        |     |        |     |

**Table S3.** Hydrogen bond interactions between water molecules and protein or screened ligands in binding site.

| 1SVC (NF-κB C62A) waters |                | modified 1SVC (NF-κB) waters |                | 2ZOQ (ERK1) waters |                | 4QTB (ERK1) waters |                | 2AZ5 (TNF-α) waters |                |
|--------------------------|----------------|------------------------------|----------------|--------------------|----------------|--------------------|----------------|---------------------|----------------|
| Residue                  | water molecule | Residue                      | water molecule | Residue            | water molecule | Residue            | water molecule | Residue             | water molecule |
| Arg54                    | HOH452         | His144                       | HOH429         | Asp128             | HOH451         | Asp184             | HOH504         | Gly121              | HOH228         |
| Gly55                    | HOH408         | Glu63                        | HOH437         |                    | HOH543         |                    | HOH517         |                     | HOH252         |
| Ser249                   | HOH452         | Hie67                        | HOH437         | Gly54              | HOH391         |                    | HOH597         |                     |                |
| Asn250                   | HOH423         | Thr146                       | HOH430         | Gln122             | HOH389         |                    | HOH687         |                     |                |
| Ile253                   | HOH405         | ligand                       | HOH430         | Glu126             | HOH454         | Ser74              | HOH508         |                     |                |
| Arg336                   | HOH452         |                              | HOH429         | Ser170             | HOH523         |                    | HOH662         |                     |                |
| Glu344                   | HOH405         |                              | HOH420         | Asp184             | HOH479         |                    | HOH747         |                     |                |
|                          |                |                              |                | Ligand             | HOH543         | Arg84              | HOH714         |                     |                |
|                          |                |                              |                |                    | HOH391         |                    | HOH834         |                     |                |
|                          |                |                              |                |                    | HOH523         | Ala52              | HOH727         |                     |                |
|                          |                |                              |                |                    |                |                    | HOH645         |                     |                |
|                          |                |                              |                |                    |                | Asp128             | HOH590         |                     |                |
|                          |                |                              |                |                    |                |                    | HOH1026        |                     |                |
|                          |                |                              |                |                    |                | Ile48              | HOH715         |                     |                |
|                          |                |                              |                |                    |                | Gly51              | HOH645         |                     |                |
|                          |                |                              |                |                    |                | Tyr53              | HOH508         |                     |                |
|                          |                |                              |                |                    |                | Glu77              | HOH662         |                     |                |
|                          |                |                              |                |                    |                | Glu88              | HOH517         |                     |                |
|                          |                |                              |                |                    |                | Ile120             | HOH553         |                     |                |
|                          |                |                              |                |                    |                | Gln122             | HOH553         |                     |                |
|                          |                |                              |                |                    |                | Met125             | HOH649         |                     |                |
|                          |                |                              |                |                    |                | Lys131             | HOH715         |                     |                |
|                          |                |                              |                |                    |                | Ser170             | HOH590         |                     |                |
|                          |                |                              |                |                    |                | Asn171             | HOH683         |                     |                |

**Table S4.** Residues included in each binding site. For the unmodified 1SVC, this was determined by the binding site detection tool in Maestro, for all other proteins, it was determined based on interactions with the known bound ligand.

| 1SVC (NF-κB C62A) binding site |                |                            |                 | modified 1SVC (NF-κB) binding site |                |                     |                 | 4QTB (ERK1) binding site |                |                            |                 | 2ZOQ (ERK1) binding site |                |                            |                 | 2AZ5 (TNF-α) binding site |                |                     |                 |
|--------------------------------|----------------|----------------------------|-----------------|------------------------------------|----------------|---------------------|-----------------|--------------------------|----------------|----------------------------|-----------------|--------------------------|----------------|----------------------------|-----------------|---------------------------|----------------|---------------------|-----------------|
| amino acid                     | residue number | type of interaction        | number of bonds | amino acid                         | residue number | type of interaction | number of bonds | amino acid               | residue number | type of interaction        | number of bonds | amino acid               | residue number | type of interaction        | number of bonds | amino acid                | residue number | type of interaction | number of bonds |
| phe                            | 56             |                            |                 | tyr                                | 60             |                     |                 | lle                      | 48             |                            |                 | ile                      | 48             |                            |                 | leu                       | 55             |                     |                 |
| arg                            | 57             | aromatic H bond            |                 | val                                | 61             | H bond              |                 | ala                      | 52             |                            |                 | gly                      | 49             |                            |                 | leu                       | 57             |                     |                 |
| phe                            | 58             |                            |                 | cys                                | 62             | H bond              |                 | tyr                      | 53             | pi cation                  |                 | glu                      | 50             |                            |                 | tyr                       | 59             |                     |                 |
| arg                            | 59             |                            |                 | leu                                | 143            |                     |                 | val                      | 56             |                            |                 | gly                      | 51             |                            |                 | ser                       | 60             |                     |                 |
| tyr                            | 60             |                            |                 | his                                | 144            | H bond              |                 | ala                      | 69             |                            |                 | val                      | 56             |                            |                 | gln                       | 61             |                     |                 |
| val                            | 61             |                            |                 | val                                | 145            |                     |                 | lys                      | 71             | H bond                     |                 | ala                      | 69             |                            |                 | tyr                       | 119            |                     |                 |
| gly                            | 64             |                            |                 | thr                                | 146            |                     |                 | ile                      | 73             |                            |                 | lys                      | 71             |                            |                 | leu                       | 120            | aromatic H bond     |                 |
| pro                            | 65             | H bond                     |                 | lys                                | 149            |                     |                 | pro                      | 75             |                            |                 | gln                      | 122            | halogen bond               |                 | gly                       | 121            |                     |                 |
| hie                            | 67             |                            |                 | thr                                | 153            | H bond              |                 | tyr                      | 81             | pi-pi stacking             |                 | asp                      | 123            | H bond                     |                 | gly                       | 122            |                     |                 |
| gly                            | 68             | H bond and aromatic H bond | 2               |                                    |                |                     |                 | arg                      | 84             |                            |                 | leu                      | 124            |                            |                 | tyr                       | 151            | aromatic H bond     |                 |
| val                            | 115            |                            |                 |                                    |                |                     |                 | thr                      | 85             |                            |                 | met                      | 125            | H bond and aromatic H bond | 2               | leu                       | 157            | salt bridge         |                 |
| gly                            | 141            |                            |                 |                                    |                |                     |                 | glu                      | 88             | salt bridge                |                 | glu                      | 126            |                            |                 |                           |                |                     |                 |
| ile                            | 142            | aromatic H bond            |                 |                                    |                |                     |                 | ile                      | 101            |                            |                 | asp                      | 128            | H bond                     |                 |                           |                |                     |                 |
| leu                            | 143            |                            |                 |                                    |                |                     |                 | gln                      | 122            | aromatic H bond            |                 | lys                      | 131            |                            |                 |                           |                |                     |                 |
|                                |                |                            |                 |                                    |                |                     |                 | asp                      | 123            | H bond                     |                 | ser                      | 170            | H bond                     |                 |                           |                |                     |                 |
|                                |                |                            |                 |                                    |                |                     |                 | leu                      | 124            |                            |                 | leu                      | 173            |                            |                 |                           |                |                     |                 |
|                                |                |                            |                 |                                    |                |                     |                 | met                      | 125            | H bond and aromatic H bond | 2               | cys                      | 183            |                            |                 |                           |                |                     |                 |
|                                |                |                            |                 |                                    |                |                     |                 | glu                      | 126            | aromatic H bond            |                 | asp                      | 184            | H bond                     |                 |                           |                |                     |                 |
|                                |                |                            |                 |                                    |                |                     |                 | thr                      | 127            |                            |                 |                          |                |                            |                 |                           |                |                     |                 |
|                                |                |                            |                 |                                    |                |                     |                 | asp                      | 128            | aromatic H bond            |                 |                          |                |                            |                 |                           |                |                     |                 |
|                                |                |                            |                 |                                    |                |                     |                 | lys                      | 131            | H bond                     |                 |                          |                |                            |                 |                           |                |                     |                 |
|                                |                |                            |                 |                                    |                |                     |                 | leu                      | 173            |                            |                 |                          |                |                            |                 |                           |                |                     |                 |
|                                |                |                            |                 |                                    |                |                     |                 | cys                      | 183            |                            |                 |                          |                |                            |                 |                           |                |                     |                 |
|                                |                |                            |                 |                                    |                |                     |                 | asp                      | 184            | salt bridge                |                 |                          |                |                            |                 |                           |                |                     |                 |
|                                |                |                            |                 |                                    |                |                     |                 | gly                      | 186            |                            |                 |                          |                |                            |                 |                           |                |                     |                 |

**Table S5.** Docking scores for each compound with each protein, showing every water condition. More negative binding scores correspond to better binding.

|          | Water removed |            |               |        |        |        | Water in binding site |            |               |         |        |        | Limited water      |          |
|----------|---------------|------------|---------------|--------|--------|--------|-----------------------|------------|---------------|---------|--------|--------|--------------------|----------|
|          | 1SVC site1    | 1SVC site2 | modified 1SVC | 2ZOQ   | 4QTB   | 2AZ5   | 1SVC                  | 1SVC site2 | modified 1SVC | 2ZOQ    | 4QTB   | 2AZ5   | 4QTB docking score | mean     |
| control1 | -6.365        | -2.649     | -6.46         | -6.352 | -5.533 | -6.457 | -4.561                | -2.211     | -3.635        | -10.975 | -2.076 | -6.166 | -3.151             | -5.12238 |
| OS       | -2.597        | -2.461     | -4.294        | -3.677 | -4.777 | -4.151 | -2.837                | -2.611     | -1.28         | -6.49   | -3.944 | -5.057 | -4.627             | -3.75408 |
| 1        | -2.978        | -2.765     | -5.102        | -5.553 | -5.662 | -4.918 | -3.381                | -2.358     | -1.118        | -7.375  | -5.495 | -5.136 | -5.3               | -4.39546 |
| 2        | -1.664        | -0.422     | 0.224         | -1.579 | -2.497 | -0.608 | -1.84                 | -0.26      | -1.184        | -1.542  | -0.375 | -2.426 | -1.349             | -1.194   |
| 3        | -2.708        | -0.548     | -3.229        | -5.439 | -4.484 | -5.333 | -2.022                | -1.294     | -2.307        | -6.686  | 0      | -4.905 | -3.733             | -3.28369 |
| 4        | -2.328        | -2.557     | -2.809        | -3.133 | -3.802 | -5.168 | -2.248                | -0.642     | -1.661        | -6.542  | -2.817 | -5.7   | -5.465             | -3.45169 |
| 5        | -0.305        | -1.748     | -2.454        | -2.471 | -0.462 | -5.503 | -0.713                | 0.078      | -2.18         | -6.283  | -4.398 | -4.791 | -4.982             | -2.78554 |
| 6        | -1.064        | -1.908     | -3.204        | -3.932 | -4.521 | -5.776 | -1.224                | -1.866     | -2.42         | -3.614  | -4.206 | -4.753 | -4.899             | -3.33746 |
| 7        | -2.172        | -2.173     | -4.861        | -3.394 | -4.812 | -5.198 | -2.34                 | -2.365     | -2.599        | -6.065  | -2.525 | -4.906 | -5.131             | -3.73392 |
| 8        | -2.424        | -1.826     | -4.219        | -3.168 | -5.158 | -5.537 | -2.186                | -2.133     | -2.682        | -5.492  | -4.668 | -5.491 | -4.642             | -3.81738 |
| 9        | -2.689        | -2.149     | -2.982        | -3.233 | -8.097 | -5.043 | -2.161                | -2.335     | -1.902        | -4.796  | 0      | -4.752 | -6.423             | -3.58169 |
| 10       | -2.257        | -0.859     | -3.026        | -3.172 | -3.995 | -5.981 | -2.539                | -2.124     | -2.174        | -2.592  | 0      | -5.942 | -4.264             | -2.99423 |
| 11       | -2.69         | -2.72      | -4.451        | -3.137 | -4.878 | -5.391 | -3.154                | -2.85      | -2.473        | -6.624  | 0      | -5.506 | -3.228             | -3.62323 |
| 12       | -3.722        | -1.146     | -3.893        | -5.578 | -6.955 | -5.165 | -2.629                | 2.365      | -2.722        | -7.32   | -3.552 | -5.98  | -3.736             | -3.84869 |
| 13       | -2.748        | -2.227     | -4.737        | -5.49  | -6.682 | -5.435 | -3.102                | -2.342     | -3.334        | -7.435  | -1.848 | -5.599 | -4.357             | -4.25662 |
| 14       | -2.946        | -2.342     | -4.292        | -5.659 | -4.499 | -4.715 | -2.954                | -2.699     | -2.658        | -6.493  | -0.624 | -4.61  | -4.326             | -3.75515 |
